# Supplementary material for: Characterization of B-cell and T-cell responses to a tetravalent dengue purified inactivated vaccine in healthy adults
Source: PubMed Central journal article supplement (PMC9622737; doi:10.1038/s41541-022-00537-2), 2022-10-31
Supplement: 41541_2022_537_MOESM1_ESM.pdf [file 41541_2022_537_MOESM1_ESM.pdf]

## **Title page**

**Manuscript title:** Characterization of B-cell and T-cell responses to a tetravalent dengue purified inactivated vaccine in healthy adults

**Author(s):** Heather Friberg<sup>1,\*</sup>, Morgan Gargulak<sup>1</sup>, Amanda Kong<sup>1</sup>, Leyi Lin<sup>1</sup>, Luis J. Martinez<sup>1</sup>, Alexander C. Schmidt<sup>2</sup>, Robert M. Paris<sup>2</sup>, Richard G. Jarman<sup>1</sup>, Clemente Diaz<sup>3</sup>, Stephen J. Thomas<sup>1</sup>, Philippe Moris<sup>4</sup> and Jeffrey R. Currier<sup>1</sup>

### **Affiliations:**

<sup>1</sup>Viral Diseases Branch, Walter Reed Army Institute of Research, Silver Spring, MD, United States

<sup>2</sup>GSK, Rockville, MD, United States

<sup>3</sup>University of Puerto Rico School of Medicine, San Juan, Puerto Rico

<sup>4</sup>GSK, Rixensart, Belgium

### **Corresponding author:**

\*Heather Friberg

Walter Reed Army Institute of Research

Silver Spring, MD, United States.

[heather.l.friberg-robertson.civ@mail.mil](mailto:heather.l.friberg-robertson.civ@mail.mil)

**Supplementary table 1. Fold change in the percentage of activated CD38+ Ki67+ CD4+ T cells among total CD4+ T cells for dengue-naïve adults (adapted according-to-protocol cohort for immunogenicity subset)**

|               | 1 µg + Alum |          |       | 4 µg + Alum |          |          |          |          | 1 µg + AS01 <sub>E</sub> |          |          |          | 1 µg + AS03 <sub>B</sub> |          |          |          | Placebo  |          |          |         |
|---------------|-------------|----------|-------|-------------|----------|----------|----------|----------|--------------------------|----------|----------|----------|--------------------------|----------|----------|----------|----------|----------|----------|---------|
|               | P1          | P2       | P3    | P1          | P2       | P3       | P4       | P5       | P1                       | P2       | P3       | P4       | P1                       | P2       | P3       | P4       | P1       | P2       | P3       | P4      |
| <b>DENV-1</b> |             |          |       |             |          |          |          |          |                          |          |          |          |                          |          |          |          |          |          |          |         |
| D7            | 0.164634    |          |       | 2.297297    | 0        | 0.110931 | 0        | 0        | 7.757764                 | 6.441176 | 0.502513 |          | 11.12766                 |          | 8.333333 |          | 1.5      | 3.086957 |          |         |
| D28           | 0.359756    |          |       | 2.306306    | 2.348624 | 0.778138 | 2.077778 | 1.144737 | 4.459627                 | 17.79412 | 2.130653 | 2.436916 | 1.468085                 |          | 43.16667 |          | 0.518433 | 3.478261 | 1.169725 |         |
| D35           | 0.567073    |          |       | 2.576577    | 7.247706 | 0.926316 | 6.222222 | 3.144737 | 1.993789                 | 10.76471 | 3.100503 | 2.567757 | 6.238298                 |          | 135.6667 |          | 0.875576 | 1.565217 | 0.385321 |         |
| D56           | 1.152439    |          |       | 6.846847    | 5.431193 | 0.617814 | 8.722222 | 7.171053 | 19.68944                 | 19.5     | 3.427136 |          | 13.97872                 |          | 182.3333 |          | 0.698157 |          | 0.880734 |         |
| M7            | 2.792683    |          |       | 2.657658    | 2.541284 | 0.652632 | 1.888889 | 14.78947 | 2.826087                 | 23.52941 |          | 0.079439 | 17.34043                 |          | 59       |          | 1.170507 |          | 1.027523 |         |
| M13           | 3.890244    |          |       | 1.54955     | 2.504587 | 0.845344 | 3.677778 | 43.13158 | 3.037267                 | 23.23529 |          |          | 18.19149                 |          | 378.3333 |          |          | 10.47826 | 0.59633  |         |
| <b>DENV-2</b> |             |          |       |             |          |          |          |          |                          |          |          |          |                          |          |          |          |          |          |          |         |
| D7            | 0.456311    | 0.151515 |       | 1.160752    | 0.682927 | 1.785714 |          |          | 1.568627                 | 0.942466 | 6.591837 |          | 1.420664                 | 4.232456 | 4.583333 | 1.08744  | 1.449561 |          | 0.150696 | 1.25061 |
| D28           | 0.271845    | 2.151515 |       | 0.444676    | 21.56098 | 14.875   | 1.109589 | 1.235577 | 6.45098                  | 2.882192 | 13.5102  | 9.267123 | 0.350554                 | 2.776316 | 16.66667 | 1.798092 | 1.530702 |          | 0.443079 | 0.59213 |
| D35           | 0.553398    | 4.280303 |       | 1.039666    | 4.97561  | 13.17857 | 1.029354 | 1.519231 | 5.245098                 | 2.353425 | 10.7551  |          | 4.971218                 | 6.171053 | 37.41667 | 1.761526 | 1.342105 |          | 0.150696 | 0.80098 |
| D56           | 2.291262    | 3.007576 |       | 1.480167    | 10.41463 | 14.33929 | 1.780822 | 5.956731 | 14.41176                 | 3.816438 | 16.57143 |          | 4.084871                 |          | 37.75    | 1.736089 | 2.133772 |          | 0.289107 | 0.21867 |
| M7            | 3.582524    | 1.659091 |       | 1.757829    | 4.487805 | 11.26786 | 0.489237 | 5.980769 | 5.343137                 | 2.767123 |          | 1.10274  | 4.00369                  | 3.618421 | 16.75    | 0.82194  | 1.063596 |          | 0.410319 | 0.14496 |
| M13           | 5.446602    | 3.378788 |       | 0.340292    | 3.04878  | 16.67857 | 0.618395 | 15.375   | 2.823529                 | 2.528767 |          |          | 3.450185                 |          | 56       | 0.6407   |          |          | 0.107289 | 0.12530 |
| <b>DENV-3</b> |             |          |       |             |          |          |          |          |                          |          |          |          |                          |          |          |          |          |          |          |         |
| D7            | 0.638298    | 0.26087  |       | 1.616541    | 0.375    | 1.402985 | 0.013793 |          | 9.617021                 | 3.75188  |          |          | 3.006431                 | 5.870229 | 7.733333 | 3.063232 | 1.27809  | 0.986111 | 0.031164 | 1.74911 |
| D28           | 3.170213    | 3.956522 |       | 1.132832    | 6.4375   | 6.328358 | 4.193103 |          | 11.93617                 | 7.082707 |          |          | 0.324759                 | 2.793893 | 24.66667 | 2.320843 | 0.210674 | 0.444444 | 0.538038 | 1.33922 |
| D35           | 1.702128    | 23.08696 |       | 1.473684    | 5.0625   | 19.76119 | 4.731034 |          | 4.723404                 | 3.766917 |          | 3.24375  | 0.875241                 | 2.122137 | 29.46667 | 3.274005 | 0.606742 | 0.736111 | 0.12374  | 2.44876 |
| D56           | 3.893617    | 12.73913 |       | 1.974937    | 10.21875 | 10.35821 | 5.82069  |          | 58.29787                 | 7.842105 |          |          | 2.209003                 |          | 43.2     | 3.775176 | 0.866573 |          | 0.505041 | 0.65371 |
| M7            | 9.87234     | 16.08696 |       | 1.443609    | 3.125    | 8.283582 | 3.089655 |          | 21.59574                 | 4.518797 |          | 1.39375  | 4.292605                 | 2.984733 | 13.46667 |          | 0.549157 | 0.074074 | 0.324473 | 0.86925 |
| M13           | 29.19149    | 4.73913  |       | 0.842105    |          | 11.1194  | 1.510345 |          | 10.34043                 | 4.894737 |          |          | 2.78135                  |          | 103.3333 |          |          | 0.953704 | 0.197984 | 0.24028 |
| <b>DENV-4</b> |             |          |       |             |          |          |          |          |                          |          |          |          |                          |          |          |          |          |          |          |         |
| D7            | 0.907692    | 6.116279 | 13.96 | 4.422222    | 1.136364 | 1.144068 | 0.45045  | 1.5625   | 19.08989                 | 1.688525 | 4.06     |          | 3.006431                 | 5.870229 | 7.733333 | 3.063232 | 0.375    | 1.402985 | 0.013793 | 0.03526 |

|     | 1 µg + Alum |          |       | 4 µg + Alum |          |          |          |          | 1 µg + AS01E |          |       |          | 1 µg + AS03a |          |          |          | Placebo  |          |          |         |
|-----|-------------|----------|-------|-------------|----------|----------|----------|----------|--------------|----------|-------|----------|--------------|----------|----------|----------|----------|----------|----------|---------|
|     | P1          | P2       | P3    | P1          | P2       | P3       | P4       | P5       | P1           | P2       | P3    | P4       | P1           | P2       | P3       | P4       | P1       | P2       | P3       | P4      |
| D28 | 0.876923    | 2.55814  | 10.3  | 0.24        | 33.36364 | 3.101695 | 2.414414 | 4.03125  | 6.52809      | 2.557377 | 9.1   | 3.794118 | 0.324759     | 2.793893 | 24.66667 | 2.320843 | 6.4375   | 6.328358 | 4.193103 | 0.29237 |
| D35 | 0.661538    | 8.55814  | 4.14  | 0.488889    | 9.045455 | 4.084746 | 7.252252 | 15.15625 | 1.05618      | 2.245902 | 10.7  | 5.347059 | 0.875241     | 2.122137 | 29.46667 | 3.274005 | 5.0625   | 19.76119 | 4.731034 | 0.52332 |
| D56 | 2.323077    | 12.30233 | 39.48 | 5.466667    | 13.18182 | 4.974576 | 4.189189 | 20.84375 | 23.93258     | 2.770492 | 11.94 |          | 2.209003     |          | 43.2     | 3.775176 | 10.21875 | 10.35821 | 5.82069  | 0.62229 |
| M7  | 2.323077    | 5.953488 | 19.06 | 8.364444    | 6.954545 | 4.228814 | 3.504505 | 28.5625  | 5.752809     | 1.95082  |       | 2.523529 | 4.292605     | 2.984733 | 13.46667 |          | 3.125    | 8.283582 | 3.089655 | 0.36632 |
| M13 | 6.530769    |          | 41.8  | 0.604444    | 2.272727 | 4.169492 | 3.027027 | 95.25    | 5.550562     |          |       |          | 2.78135      |          | 103.3333 |          |          | 11.1194  | 1.510345 | 0.17064 |

D, day; D0, pre-vaccination; D7, seven days post-dose 1; D28, 28 days post-dose 1; D35, seven days post-dose 2; D56, 28 days post-dose 2;

DENV, dengue virus; DPIV, tetravalent dengue purified inactivated vaccine; M, month; M7, six months post-dose 2; M13, 12 months post-dose

2; P, participant in each group with available data at any timepoint and DENV serotype.

Note: Changes are relative to D0 (pre-vaccination) values, after 6–7 days *in vitro* culture with combined DENV capsid/pre-membrane and envelope region peptide pools, following DPIV vaccination of dengue-naïve adults.

# Supplementary Fig. 1 DPIV vaccination induces a multifunctional CD4+ T cell response.

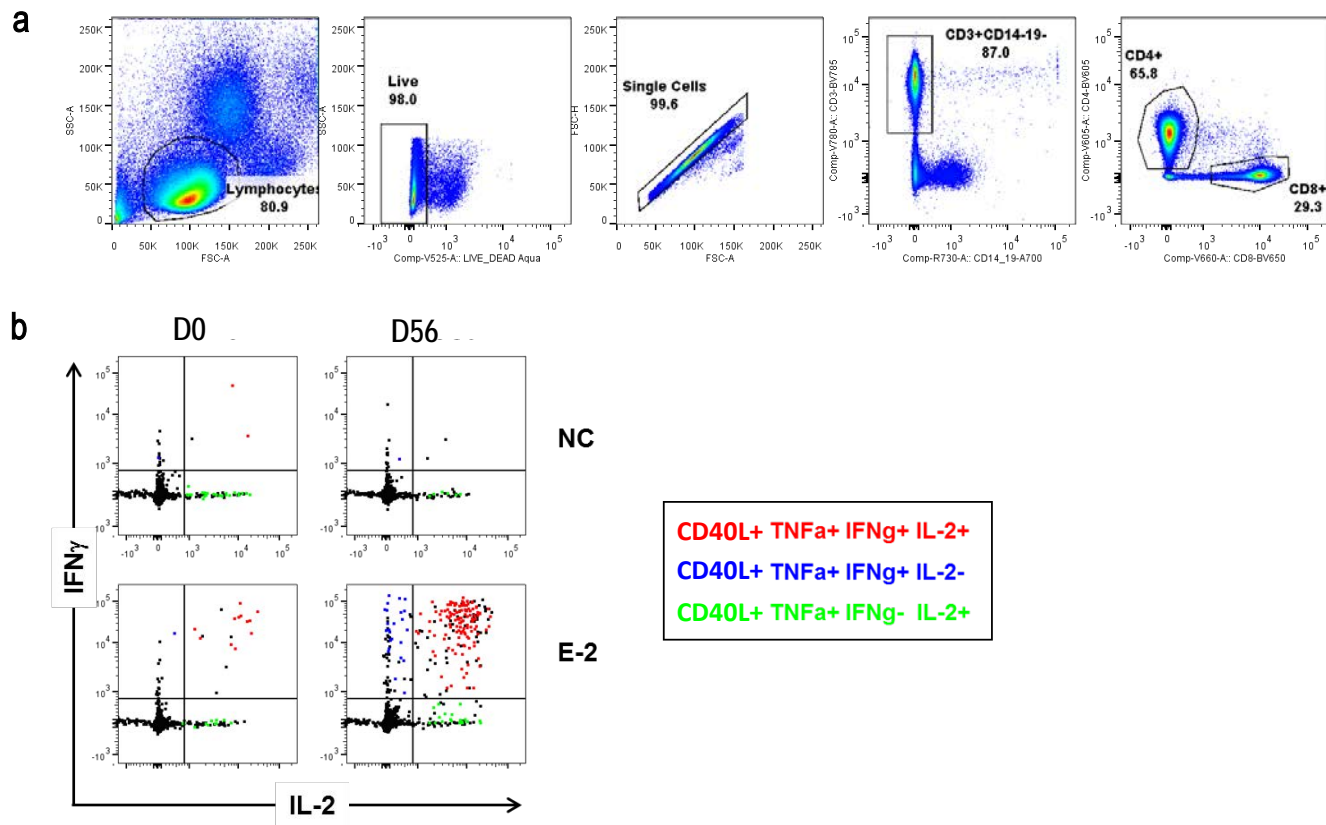

(a) Gating strategy to identify CD4+ and CD8+ T cell subsets. (b) Representative flow plots from a dengue-primed participant in study NCT01702857 showing IFN- versus IL-2 expression in CD4+ T cells after in vitro stimulation with peptide pools representing the E protein from DENV-2 (E-2). The participant whose data are represented in panel b had a pre-existing DENV-specific CD4+ T cell response, presumably from prior natural exposure that was substantially boosted by DPIV vaccination. CD, cluster differentiation; CD40L, cluster differentiation 40 ligand; day 0, pre-vaccination; day 56, 28 days post-dose 2; DENV, dengue virus; DPIV, tetraivalent dengue purified inactivated vaccine; IFN, interferon; IL, interleukin; NC, negative control.

**Supplementary Fig. 2. Multifunctional analysis of DPIV-specific CD4+ T cells**

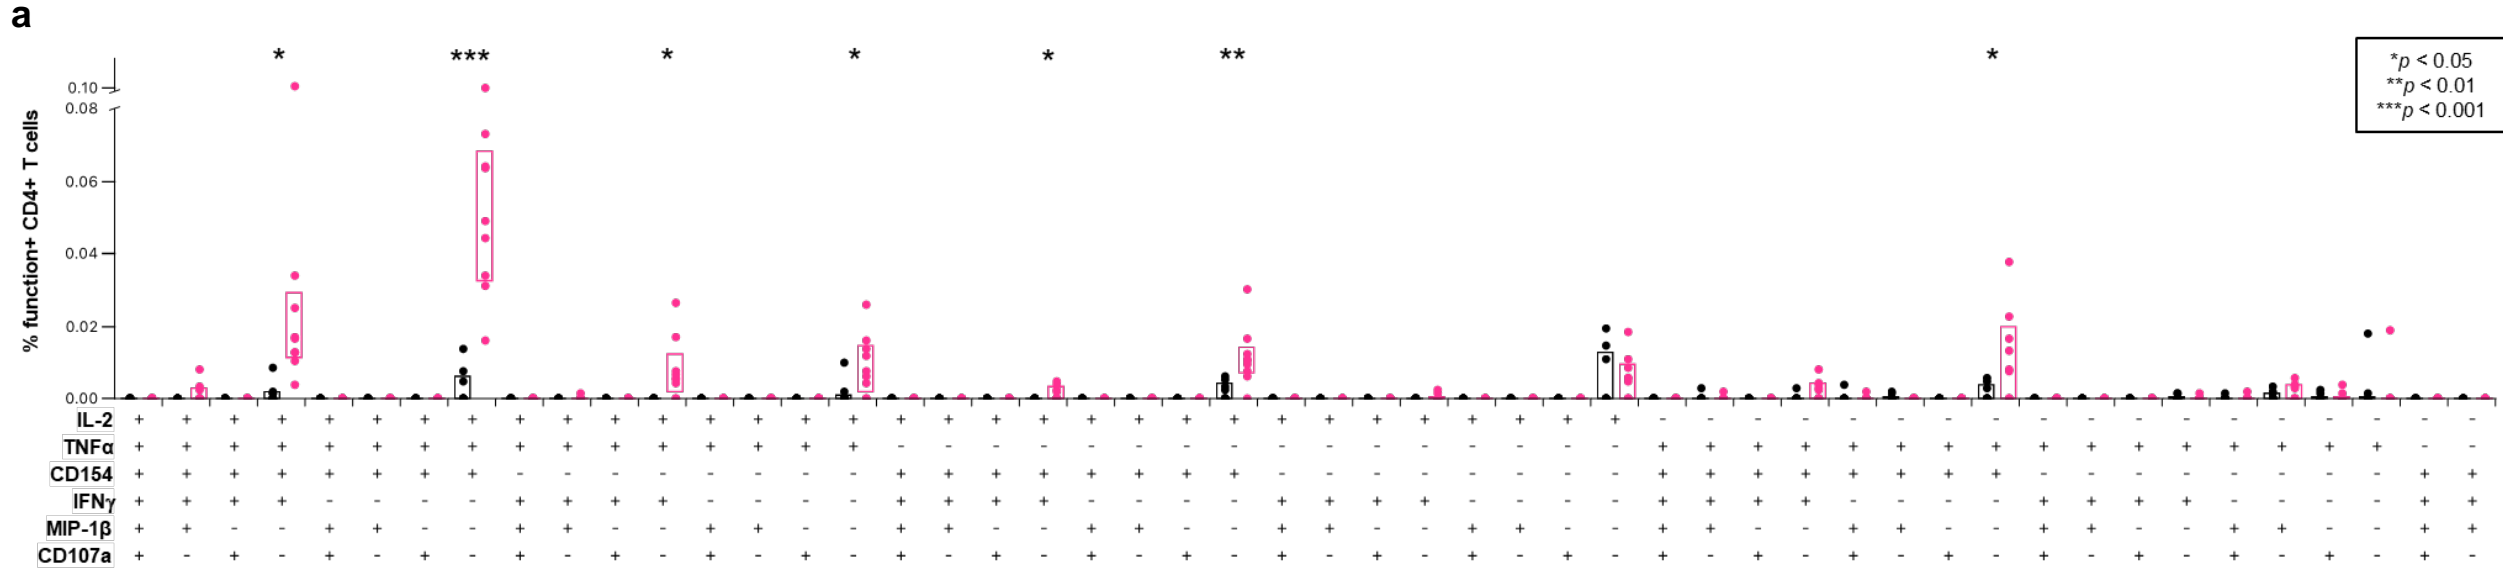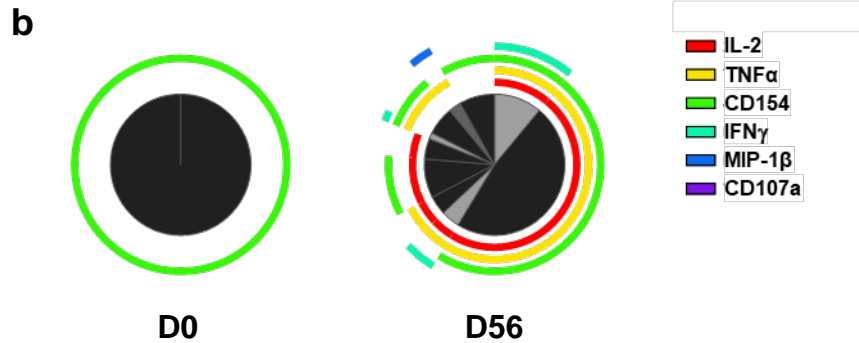

(a) The top responders to DPIV vaccination (N=9; selected for CME-specific responses to at least two DENV types that were  $\geq 3$  times the respective negative control) were selected to demonstrate the multifunctionality of DENV CME-specific CD4+ T cells elicited at day 56 post-vaccination (pink), as compared to pre-vaccination (black) responses. Boxes indicate interquartile range. Pre- versus post-vaccination responses were analyzed by Student's T test. (b) Pie charts show the average relative abundance of the different functional subpopulations. Data were background-subtracted, CM and E responses were combined, responses to DENV-1-4 were averaged, and then analyzed using SPICE v6.0 (Roederer, M., Nozzi, J. L. & Nason, M. C. SPICE: exploration and analysis of post-cytometric complex multivariate datasets. *Cytometry A* 79, 167-174 (2011)). CD, cluster differentiation; DPIV, tetravalent dengue purified inactivated vaccine; N, number of participants with data; CME, combined capsid/pre-membrane and envelope; DENV, dengue virus; IL, interleukin; TNF, tumor necrosis factor; IFN, interferon; MIP, macrophage inflammatory protein; D, day; D0, pre-vaccination; Day 56, 28 days post-dose 2.

**Supplementary Fig. 3. Frequency of multifunctional CD4+ T cells expressing at least two functional markers, specific to dengue virus serotypes 1–4.**

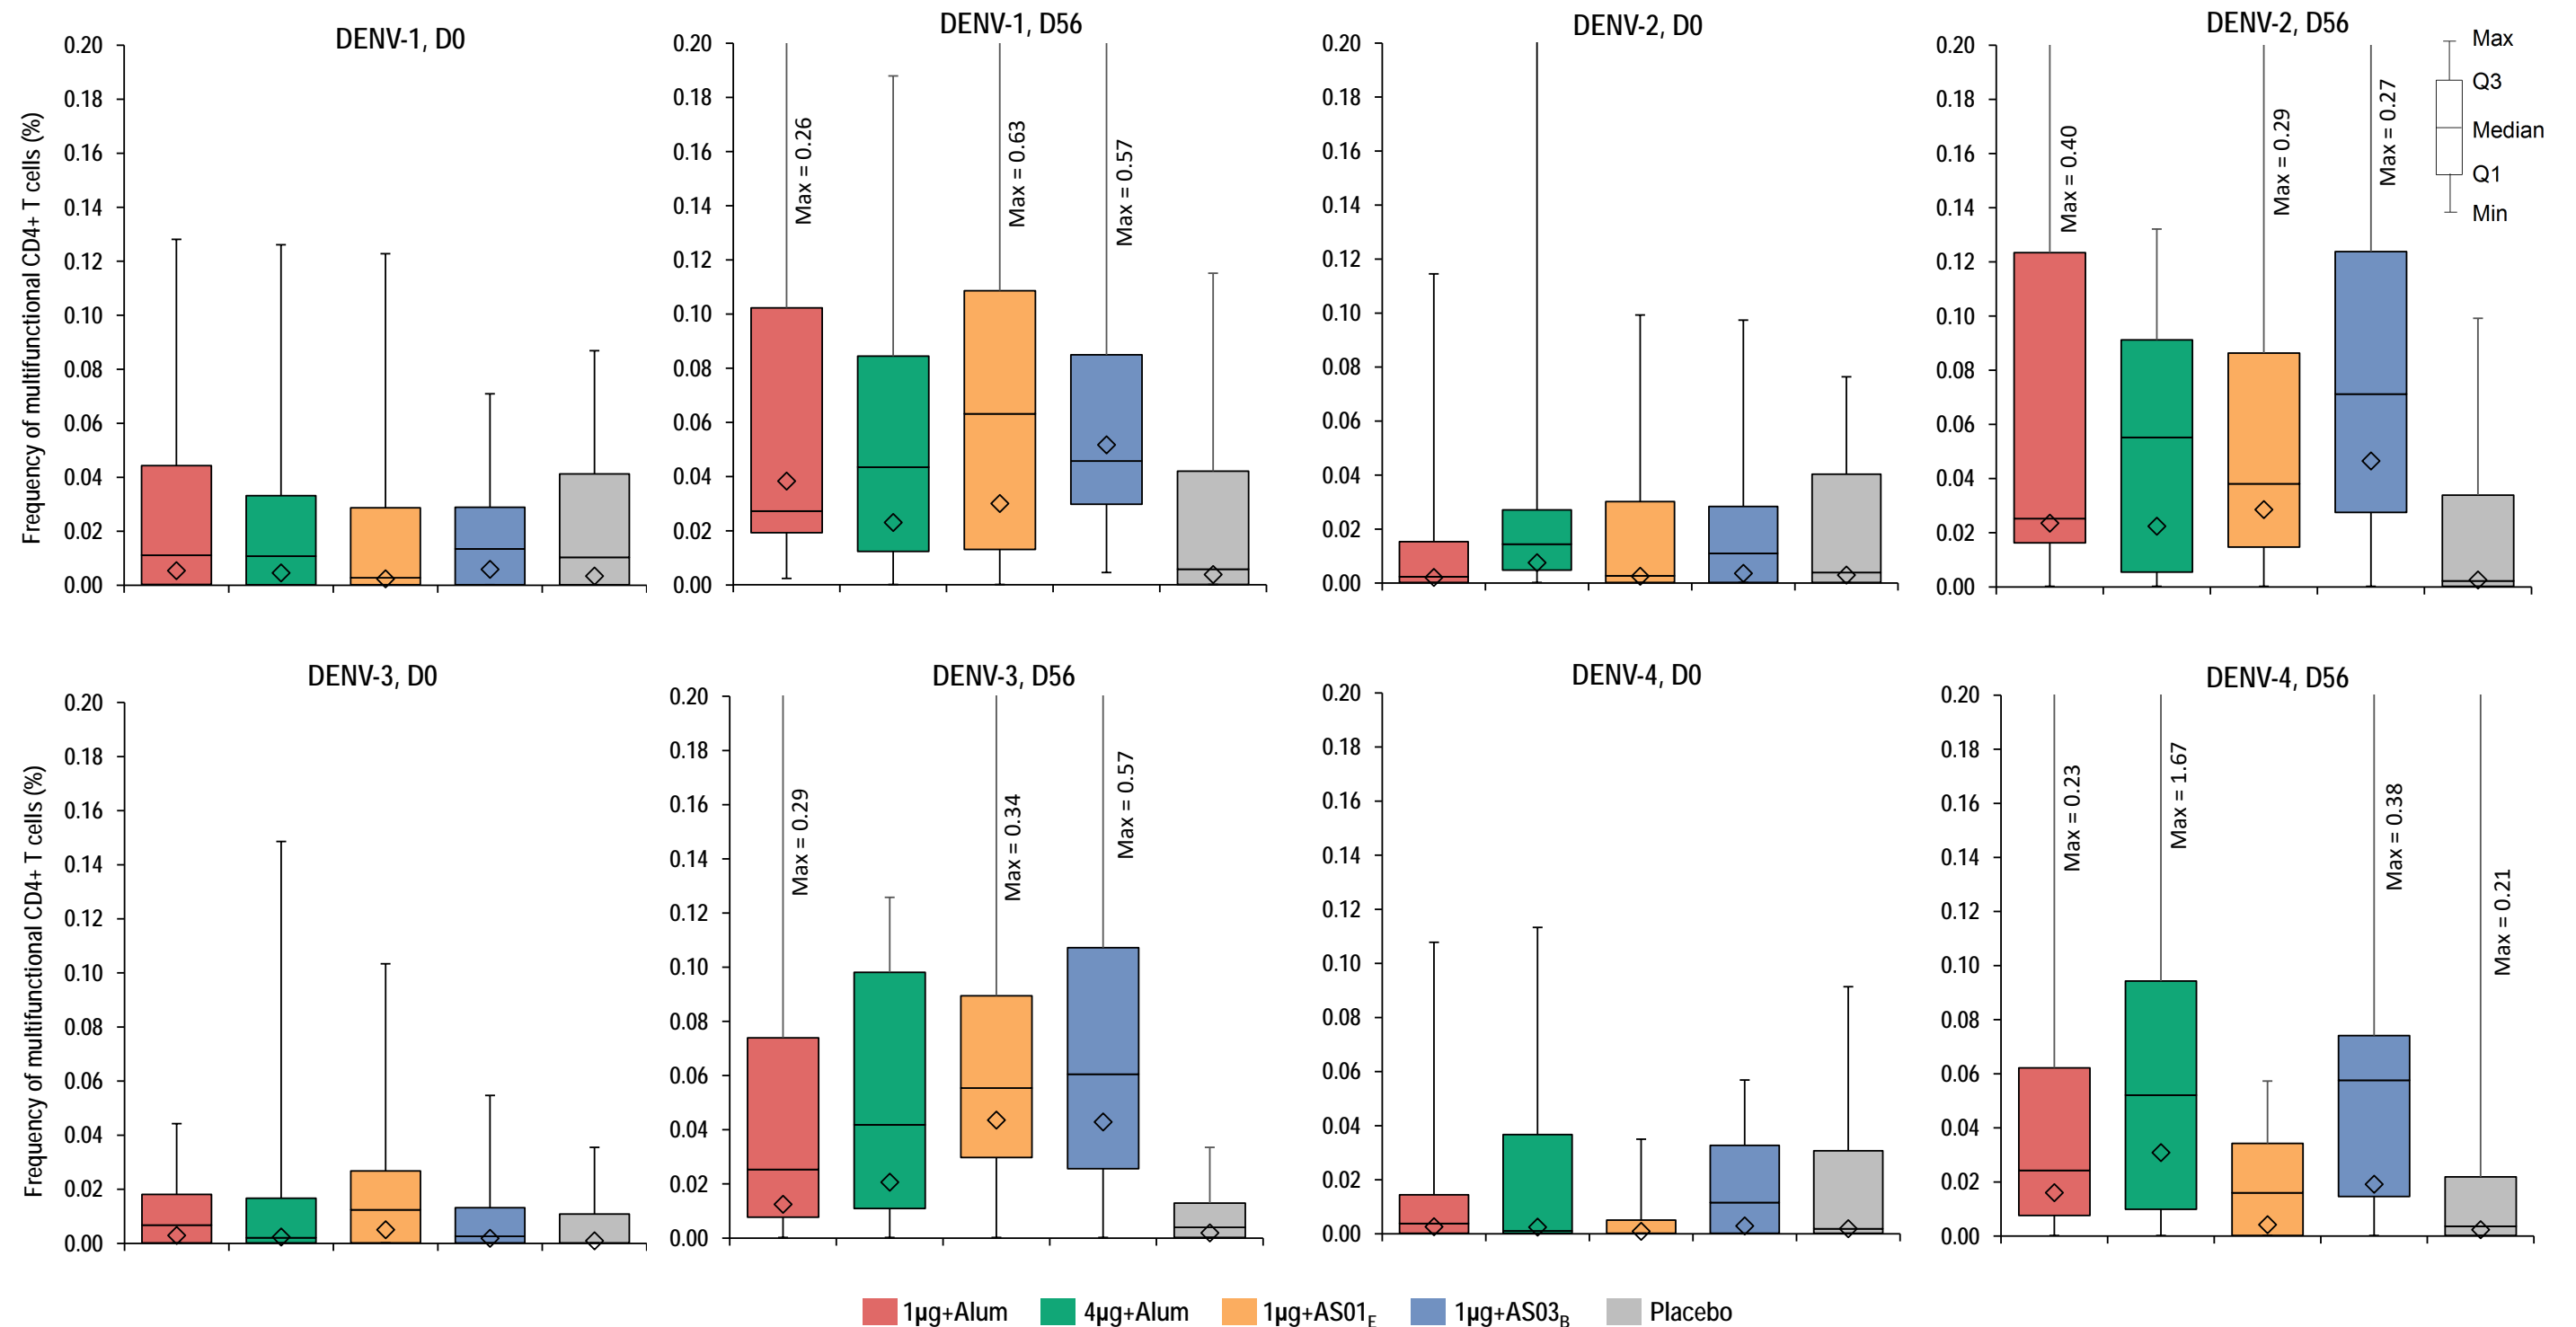

T cells were quantified using the combined capsid/pre-membrane and envelope region peptide pools in the dengue-primed population, at day 0 (pre-vaccination) and day 56 following 2-dose DPIV administration (according-to-protocol cohort for cell-mediated immunogenicity at day 56). Error bars represent Min and Max values in each group. CD, cluster differentiation; DPIV, tetravalent dengue purified inactivated vaccine; DENV, dengue virus; D, day; D0, pre-vaccination; D56, 28 days post-dose 2; DENV, dengue virus; DPIV, tetravalent dengue purified inactivated vaccine; Min/Max, minimum/maximum observation; Q1, Q3, first and third quartiles;  $\diamond$ , geometric mean frequency. For each serotype, the combined capsid/pre-membrane and envelope region peptide pools ((C+M)+E pool)-specific frequency was derived by adding the (C+M) pool specific frequency and the E pool specific frequency.

**Supplementary Fig. 4 Frequencies of CD8+ T cells specific to dengue virus serotypes 1–4 expressing at least IL-2.**

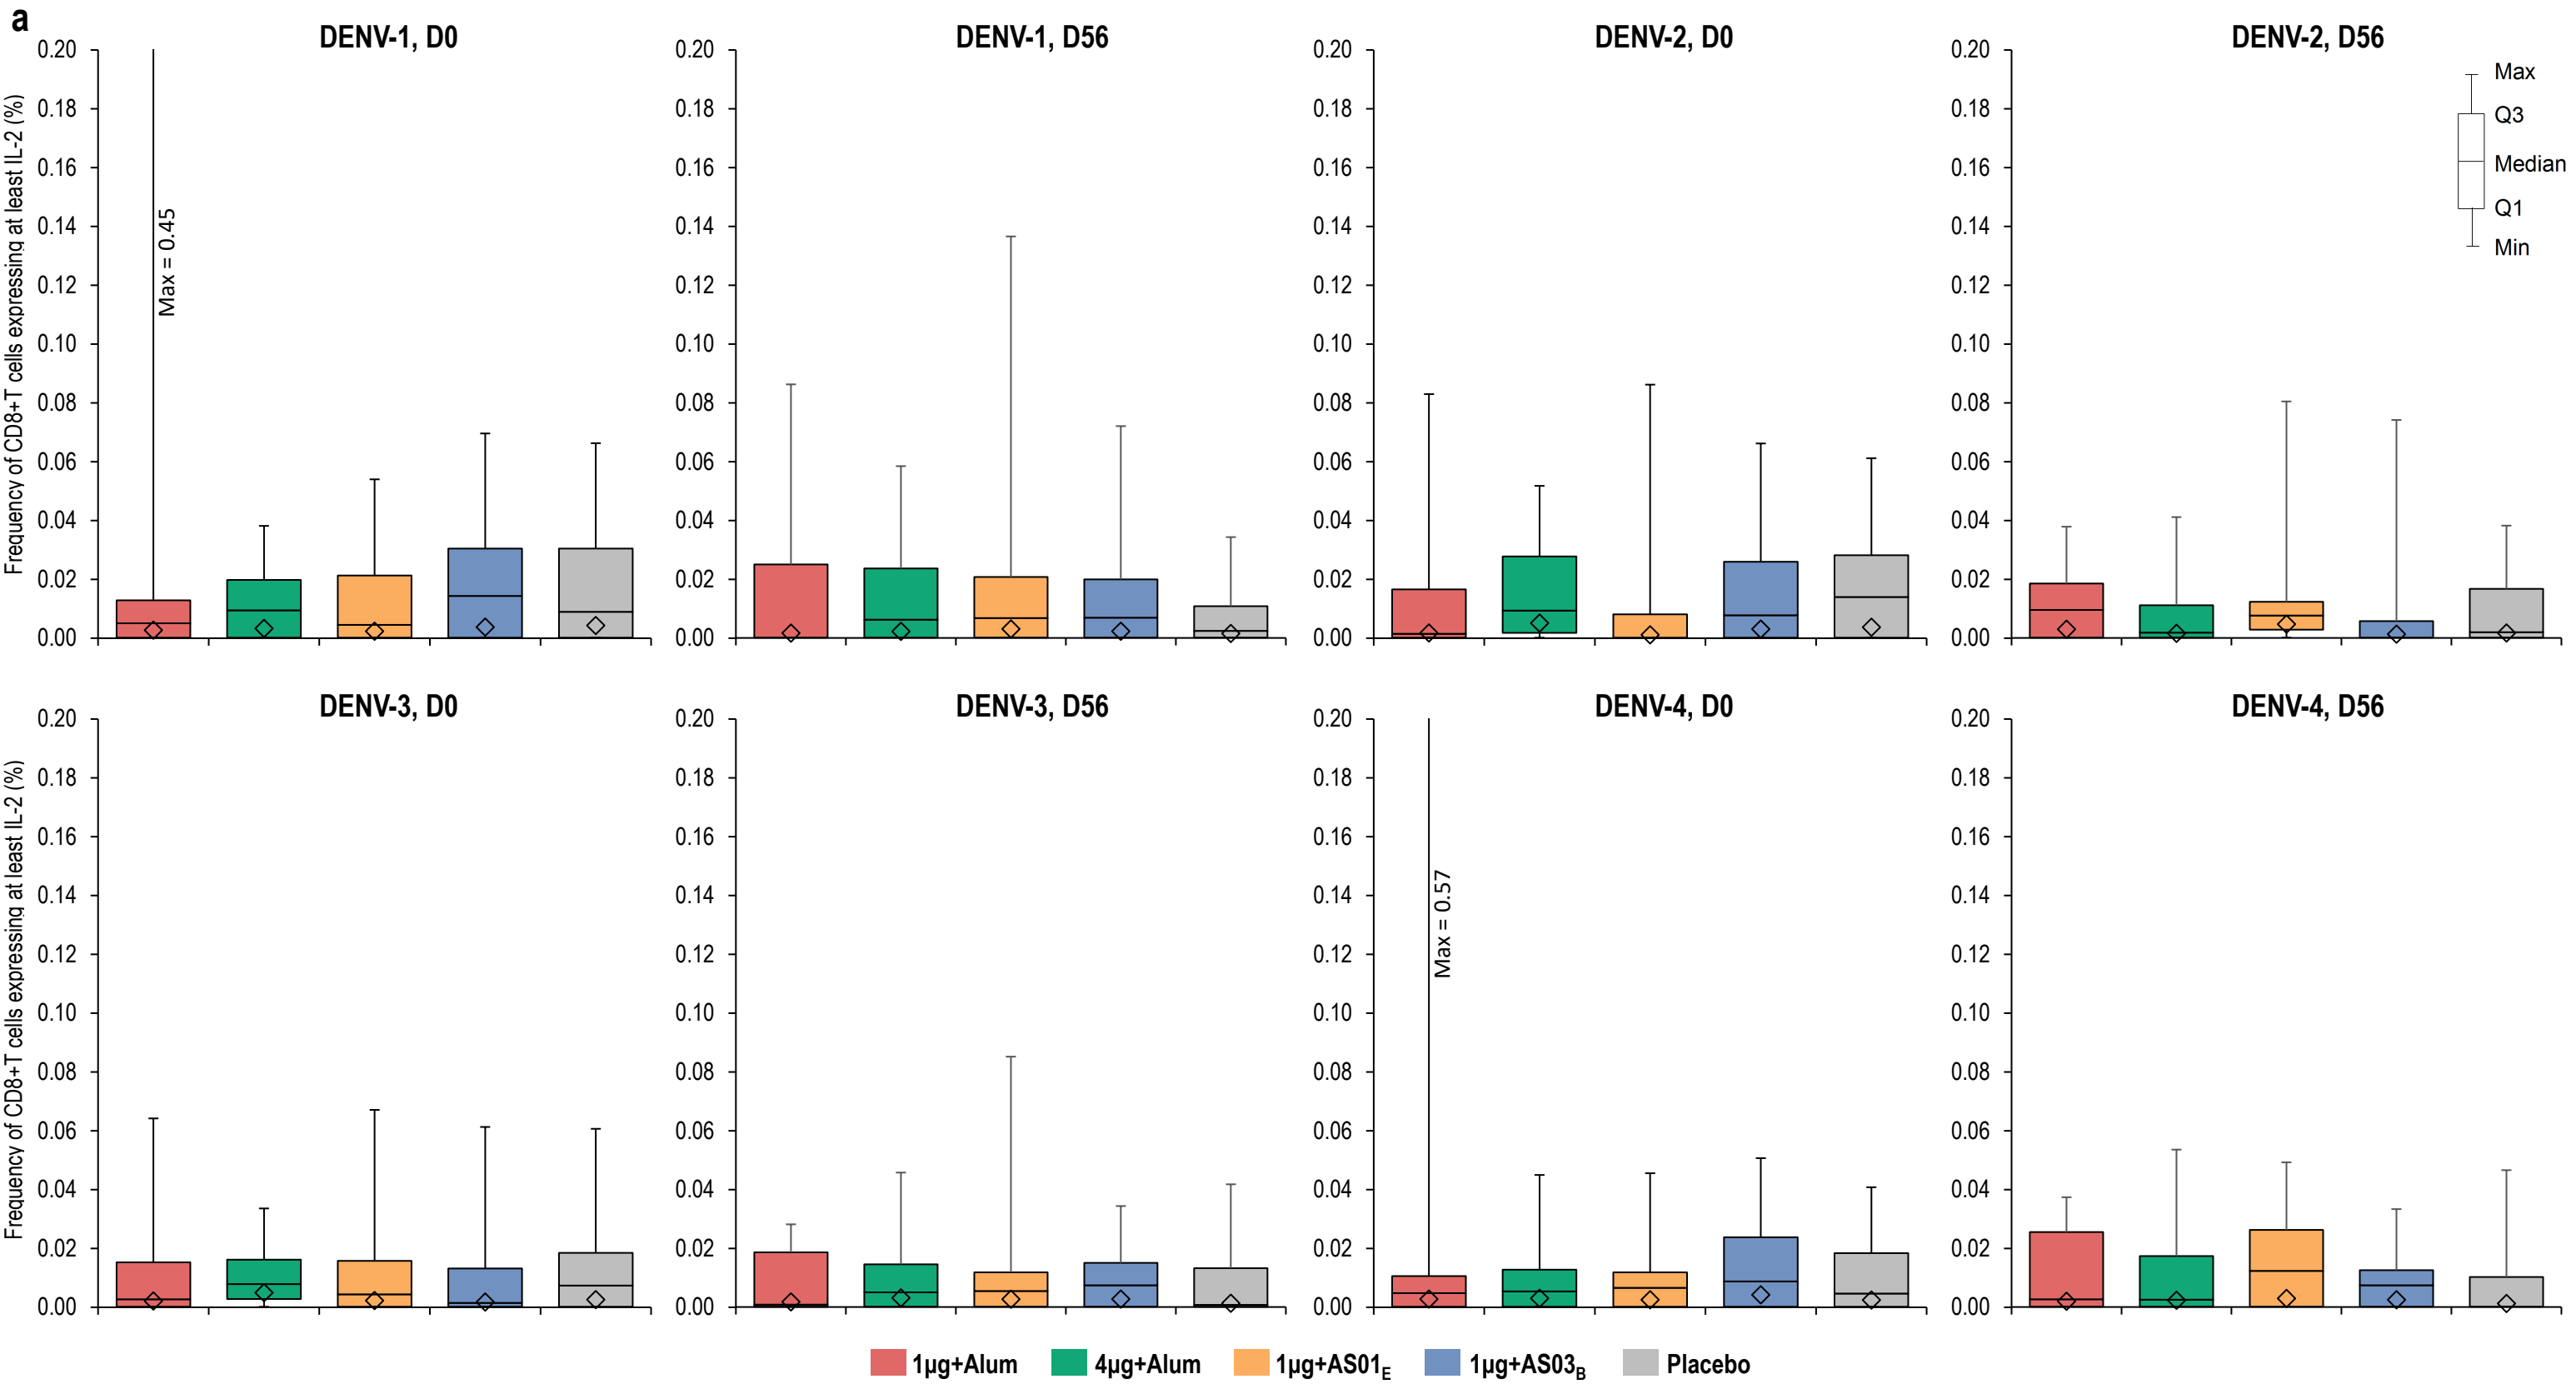

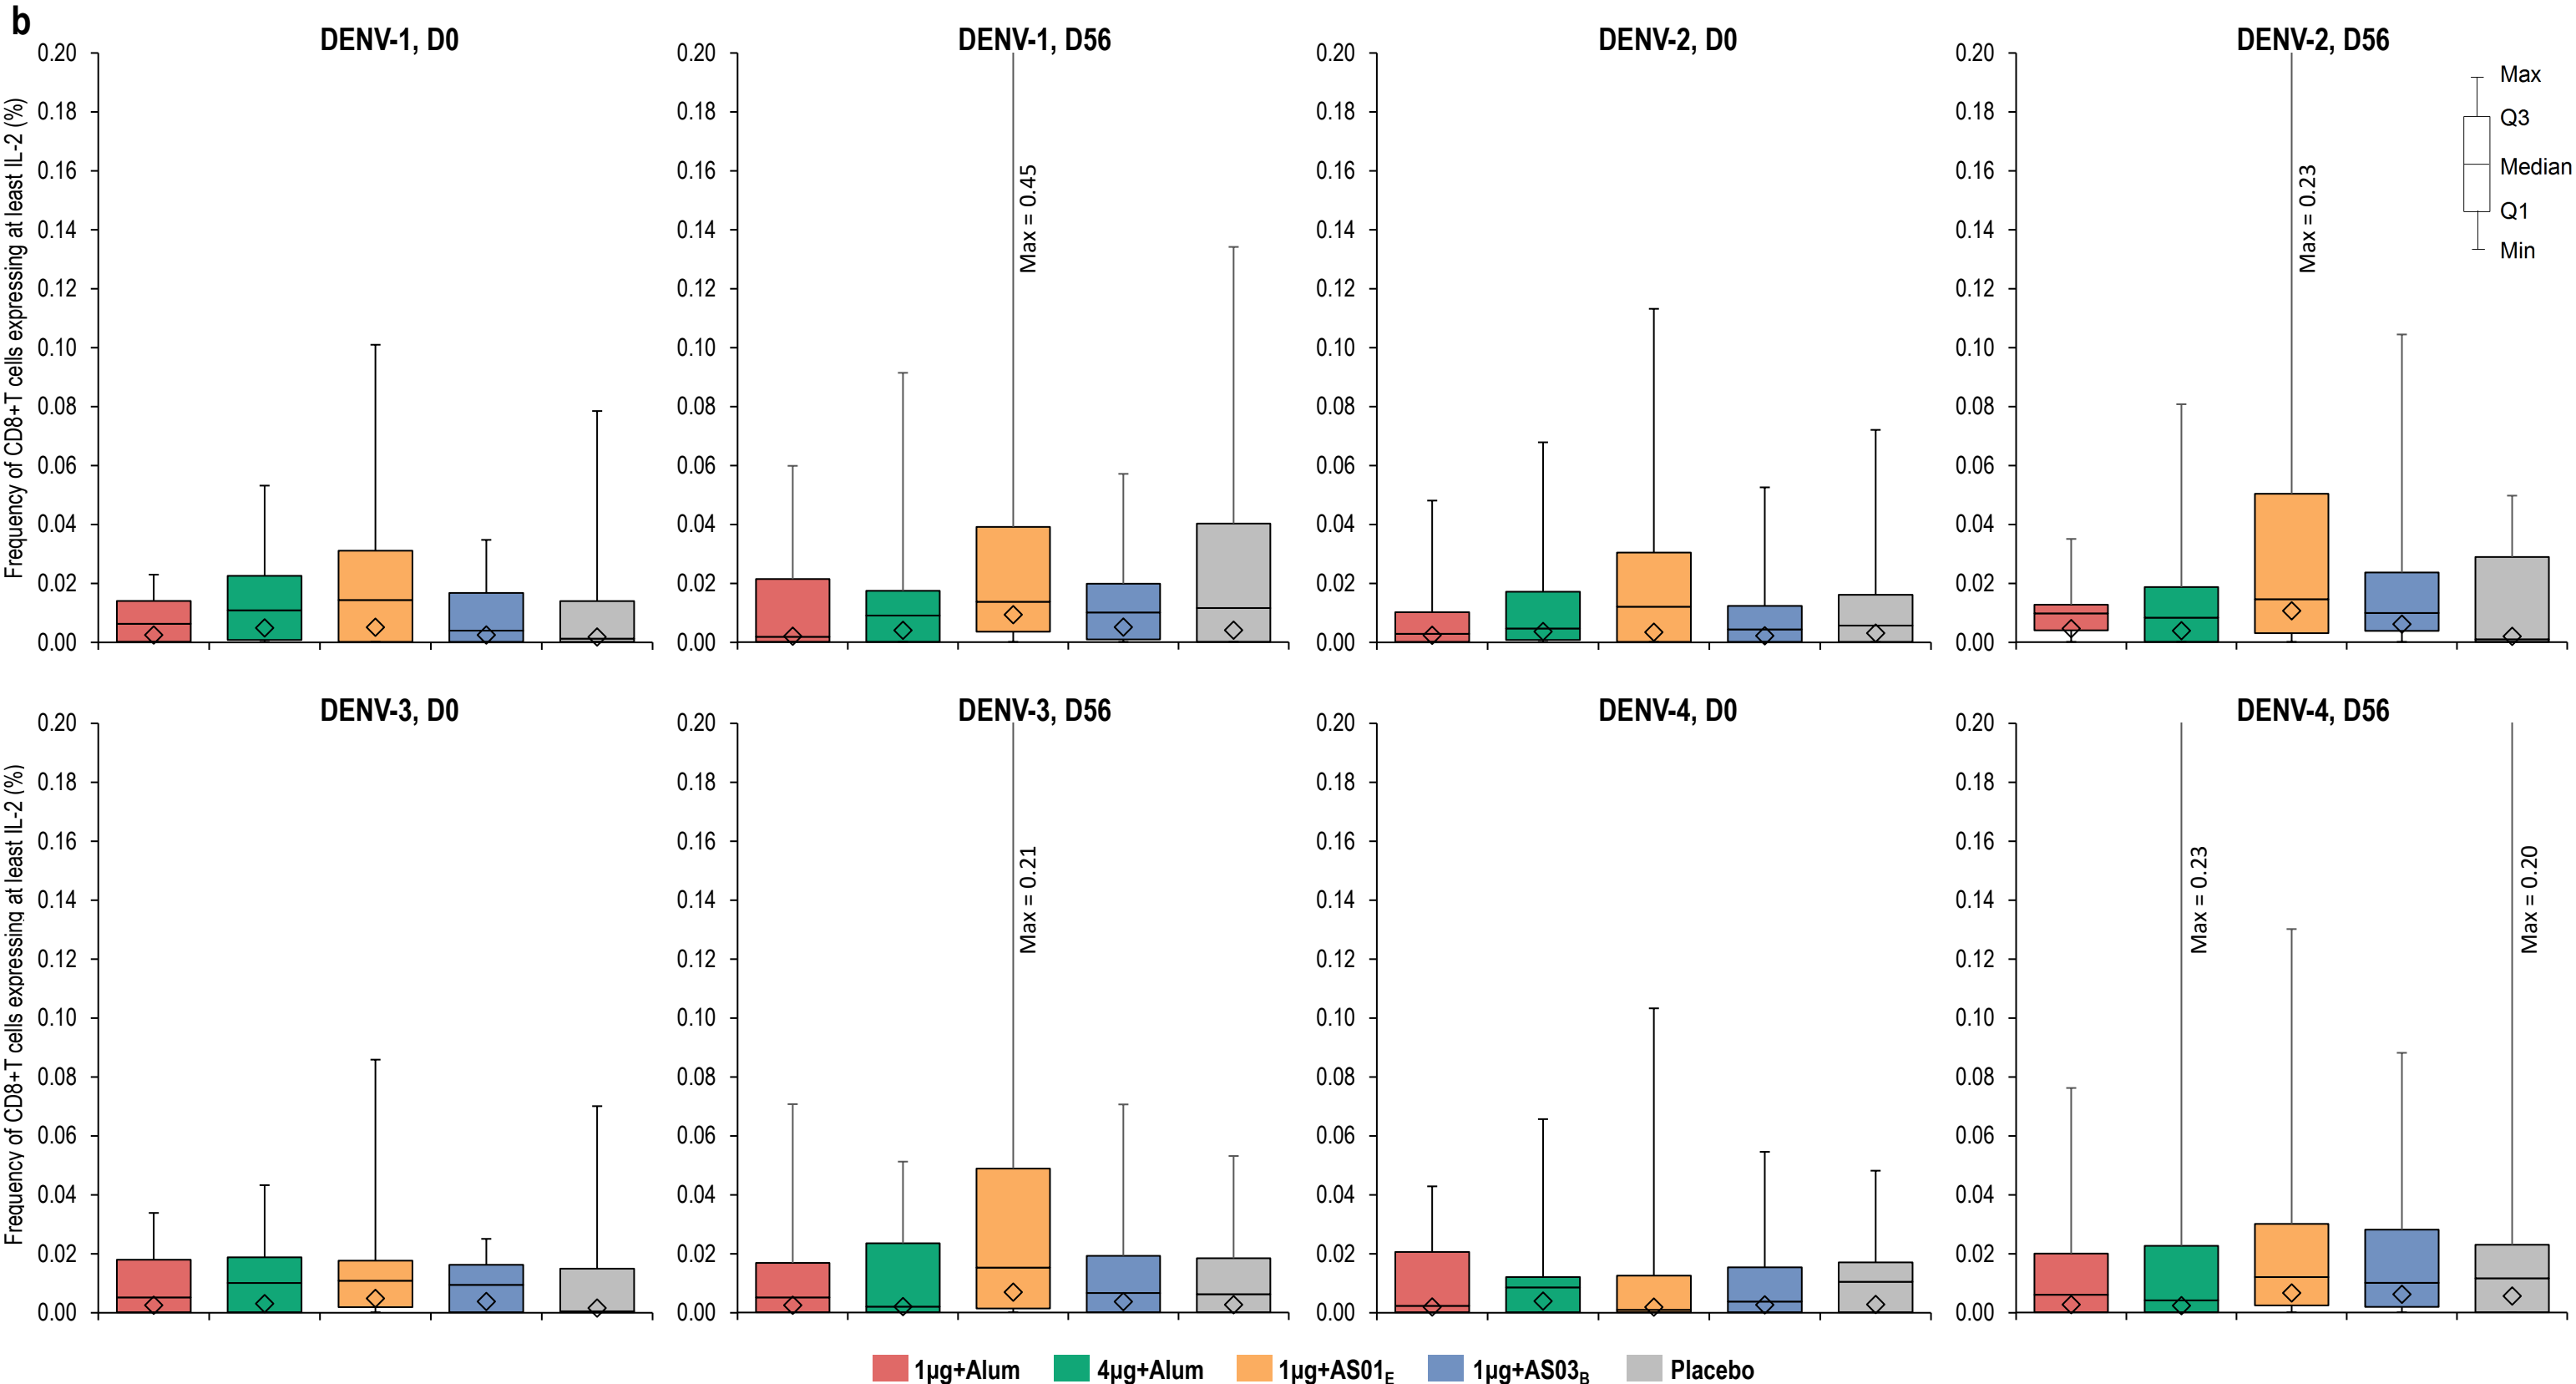

T cells were quantified using the combined capsid/pre-membrane and envelope region peptide pools in the predominantly dengue-naïve (a) and dengue-primed (b) populations (according-to-protocol cohort for cell-mediated immunogenicity at day 56), at day 0 (pre-vaccination) and day 56 following 2-dose DPIV administration. Individual values are plotted for each group. Error bars on the box plot represent the Min and Max values in each group. D, day; D0, pre-vaccination; D56, 28 days post-dose 2; DENV, dengue virus; DPIV, tetravalent dengue purified inactivated vaccine; Min/Max, minimum/maximum observation; Q1, Q3, first and third quartiles;  $\diamond$ , geometric mean frequency. For each serotype, the combined capsid/pre-membrane and envelope region peptide pools ((C+M)+E pool)-specific frequency was derived by adding the (C+M) pool specific frequency and the E pool specific frequency.



**Supplementary Fig. 5. Intracellular cytokine staining results for a subset of nine dengue-naïve adults, who received a DPIV booster dose.**

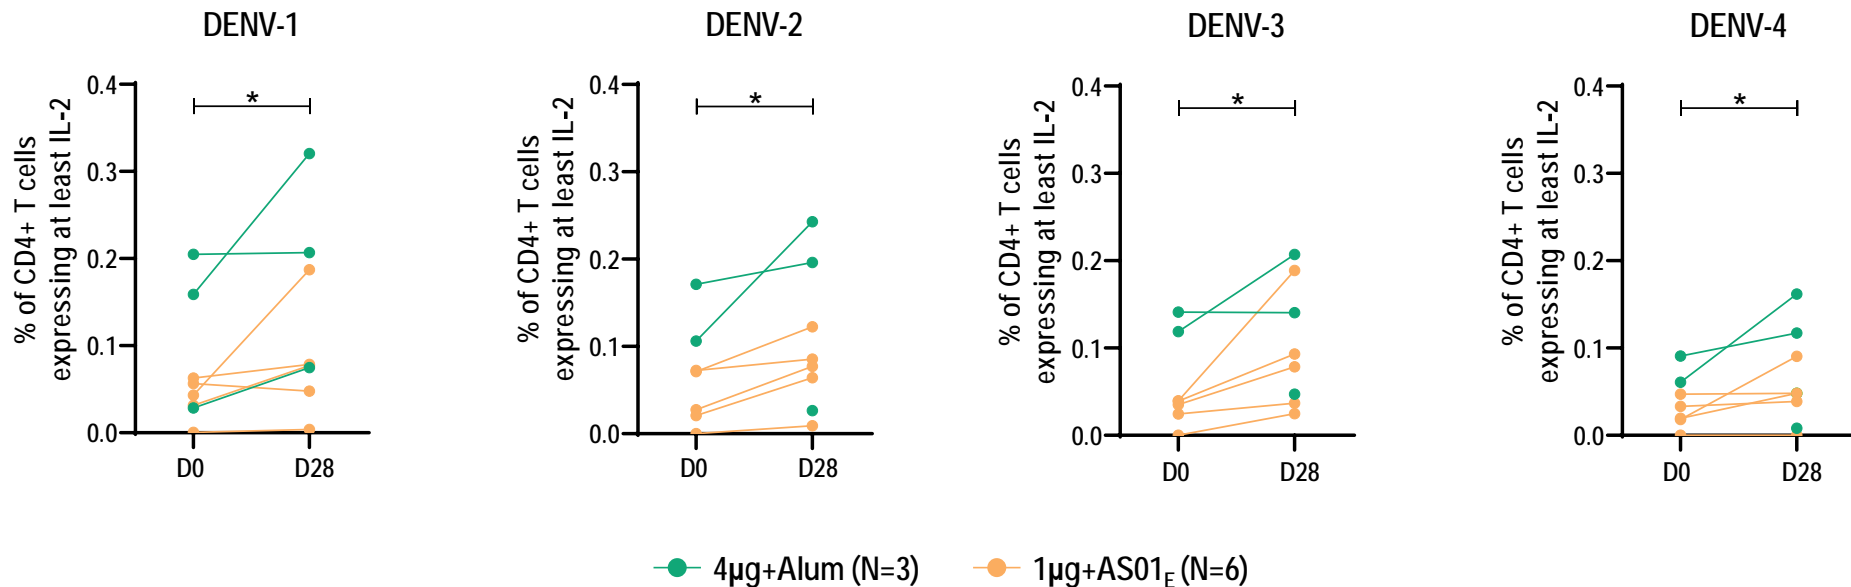

Each line represents the response of an individual participant pre-booster (D0) and 28 days (D28) post-booster. CD, cluster differentiation; DENV, dengue virus; DPIV, tetravalent dengue purified inactivated vaccine; IL, interleukin; N, number of participants who received a DPIV booster dose.

DPIV, tetravalent dengue purified inactivated vaccine; DENV, dengue virus; N, number of participants who received a DPIV booster dose. \* $p < 0.05$  by Wilcoxon.

## Supplementary Fig. 6. T cell phenotyping analysis after 6–7-day in vitro culture using the combined capsid/pre-membrane and envelope region peptide pools.

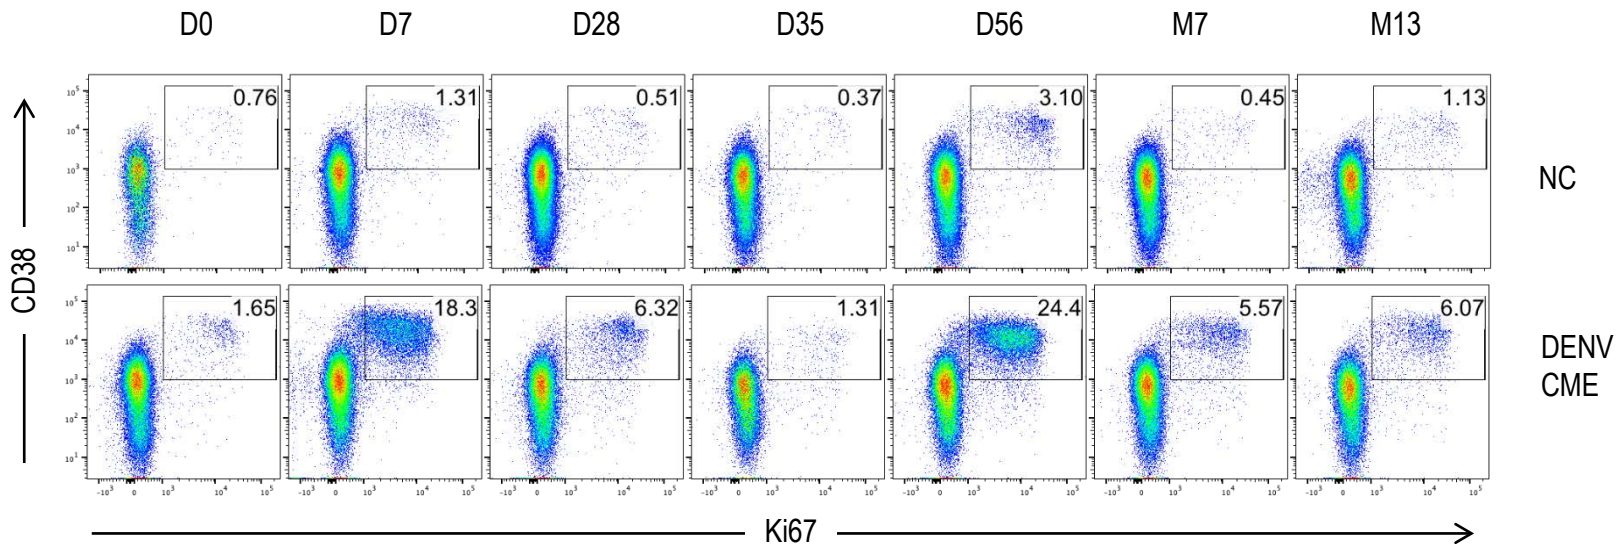

Representative flow plots show the frequency of activated (CD38+ Ki67+) CD4+ T cells of a single dengue-naïve study participant pre-vaccination (day 0) and at several time points post-vaccination. CD, cluster differentiation; CME, combined capsid/pre-membrane and envelope; D, day; D0, pre-vaccination; D7, seven days post-Dose 1; D28, 28 days post-Dose 1; D35, seven days post-dose 2; D56, 28 days post-Dose 2; DENV, dengue virus; M, month; M7, six months post-dose 2; M13, 12 months post-dose 2; NC, negative control.

**Supplementary Fig. 7. Frequencies of memory B cells and neutralizing antibodies specific to dengue virus serotypes 1–4 in dengue-naïve individuals (adapted according-to-protocol cohort for immunogenicity).**

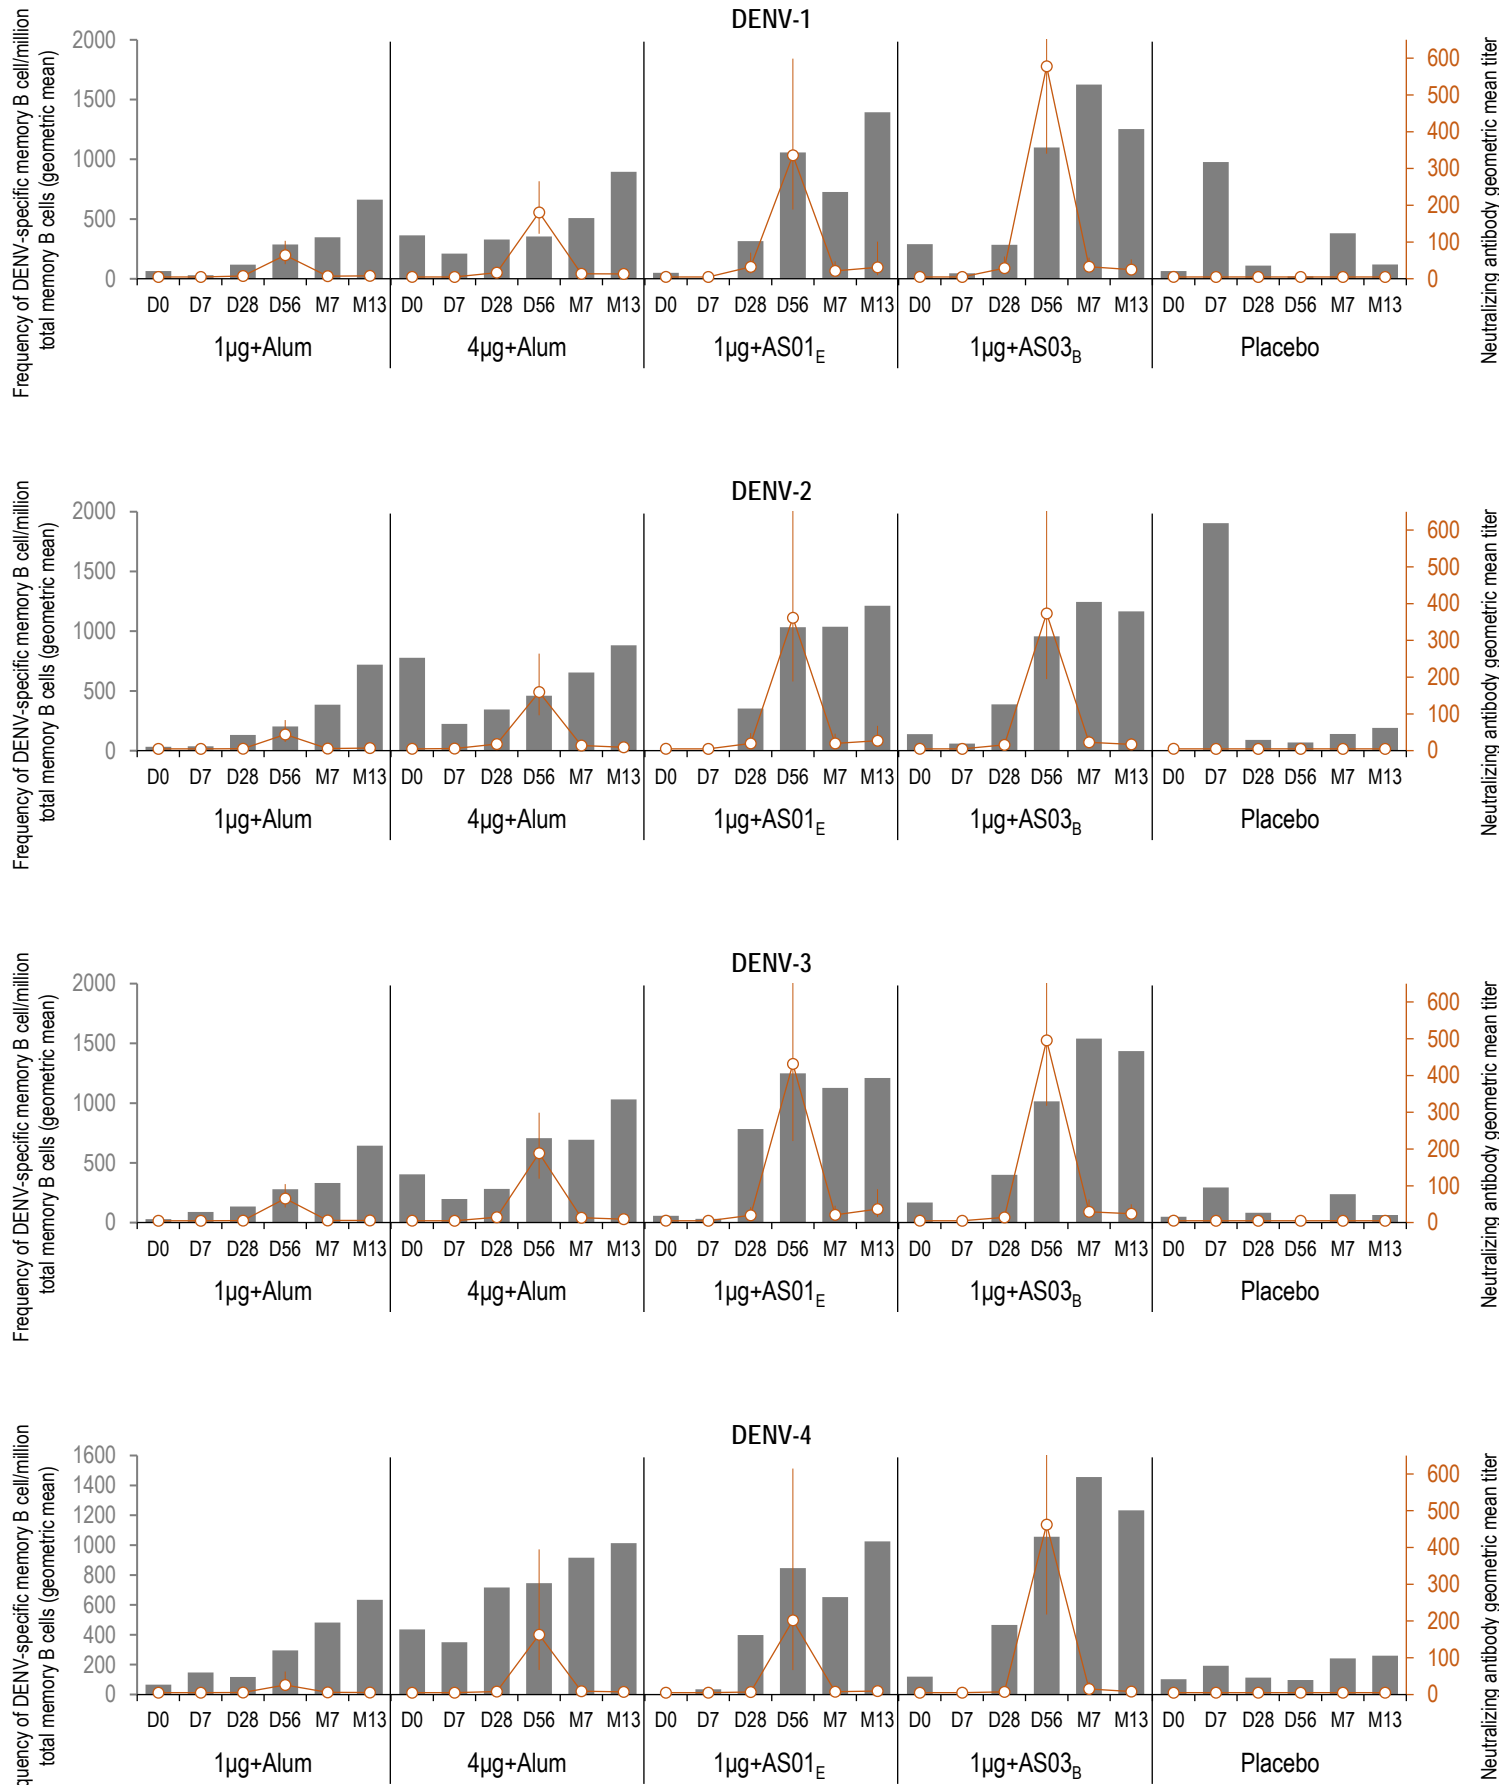

Bars represent the geometric mean of frequencies of memory B cells per million total memory B cells (primary vertical axis, left) and circles with error bars, the geometric mean titers for neutralizing antibodies to DENV 1–4 with 95% confidence intervals (secondary vertical axis, right). D, day; D0, pre-vaccination; D7, seven days post-dose 1; D28, 28 days post-dose 1; D56, seven days post-dose 2; DENV, dengue virus; DPIV, tetravalent dengue purified inactivated vaccine; M, month; M7, six months post-dose 2; M13, 12 months post-dose 2.
